# Supplementary material for: Serum Protein Biomarker Findings Reflective of Oxidative Stress and Vascular Abnormalities in Male, but Not Female, Collision Sport Athletes
Source: Front Neurol. 2020 Sep 30;11:549624. doi: 10.3389/fneur.2020.549624 (PMC7561422; doi:10.3389/fneur.2020.549624)
Supplement: Supplementary file 1 [file Table_1.docx]

| **Supplementary Table 1.** ﻿Spearman Correlation Coefficients between serum protein levels of all biomarkers in male sample. *P < 0.05, **P < 0.01. |
| --- |
| |  | HNE4 | BLBP | CLDN5 | Fibrinogen | GFAP | HMGB1 | NFL | PEA15 | pTau | Tau | UCHL1 | VEGFa | | --- | --- | --- | --- | --- | --- | --- | --- | --- | --- | --- | --- | --- | | BLBP | .67** | 1 | .743** | -.291* | 0.156 | 0.038 | .269* | .394** | .581** | 0.156 | 0.116 |  | | CLDN5 | .81** | .74** | 1 | -0.226 | .270* | 0.198 | .375** | .586** | .665** | .368** | 0.191 |  | | Fibrinogen | -.07 | -.29* | -.22 | 1 | 0.175 | -0.011 | -0.167 | -0.074 | 0.018 | .355** | -0.099 |  | | GFAP | .25* | .16 | .27* | .17 | 1 | 0.235 | 0.201 | .269* | .291* | .333** | .310** |  | | HMGB1 | .17 | .04 | .20 | -.01 | .23 | 1 | .266* | .295* | 0.168 | .314** | 0.035 |  | | NFL | .51** | .27* | .37** | -.17 | .20 | .27* | 1 | .368** | .333** | 0.188 | 0.009 |  | | PEA15 | .48** | .39** | .59** | -.07 | .27* | .29* | .37** | 1 | .271* | 0.118 | 0.152 |  | | pTau | .67** | .58** | .66** | .02 | .29* | .17 | .33** | .27* | 1 | .337** | -0.004 |  | | Tau | .51** | .16 | .37** | .35** | .33** | .31** | .19 | .12 | .34** | 1 | 0.049 |  | | UCHL1 | -.03 | .12 | .19 | -.10 | .31** | .03 | .01 | .15 | -.01 | .05 | 1 |  | | VEGFa | .82** | .68** | .79** | -.21 | .30* | .04 | .49** | .39** | .67** | .29* | .13 |  | | vWF | .71** | .45** | .63** | -.11 | .38** | .36** | .51** | .41** | .42** | .60** | -.03 | .58** | |
