# Supplementary material for: Serum Protein Biomarker Findings Reflective of Oxidative Stress and Vascular Abnormalities in Male, but Not Female, Collision Sport Athletes
Source: Front Neurol. 2020 Sep 30;11:549624. doi: 10.3389/fneur.2020.549624 (PMC7561422; doi:10.3389/fneur.2020.549624)
Supplement: Supplementary file 2 [file Table_2.docx]

| **Supplementary Table 2.** ﻿Spearman Correlation Coefficients between serum protein levels of all biomarkers in female sample. *P < 0.05, **P < 0.01. |
| --- |
| |  | HNE4 | BLBP | CLDN5 | Fibrinogen | GFAP | HMGB1 | NFL | PEA15 | pTau | Tau | UCHL1 | VEGFa | | --- | --- | --- | --- | --- | --- | --- | --- | --- | --- | --- | --- | --- | | BLBP | -.02 |  |  |  |  |  |  |  |  |  |  |  | | CLDN5 | .53** | .28* |  |  |  |  |  |  |  |  |  |  | | Fibrinogen | .31* | .0005 | .63** |  |  |  |  |  |  |  |  |  | | GFAP | .42** | -0.04 | .64** | .42* |  |  |  |  |  |  |  |  | | HMGB1 | .61** | .18 | .71** | .41** | .56** |  |  |  |  |  |  |  | | NFL | .15 | 0.04 | .44** | .40** | .45** | .14 |  |  |  |  |  |  | | PEA15 | .27 | .46** | .24 | .16 | .24 | .33 | .07 |  |  |  |  |  | | pTau | .69** | 0.20 | .82** | .54** | 0.72** | .73 | 0.43** | .40** |  |  |  |  | | Tau | .25 | .04 | .76** | .61** | .61** | .42** | .46** | .12 | .68** |  |  |  | | UCHL1 | -.21 | .09 | .38** | .41** | .41** | .12 | .38** | .40** | .38** | .44** |  |  | | VEGFa | .23 | .26 | .57** | .16 | .56** | .54** | .07 | .46** | .55** | .37** | .52** |  | | vWF | -.09 | -.11 | 0.24 | .41** | .25 | .18 | .26 | .01 | .13 | .04 | .15 | -.02 | |
