# Supplementary material for: Serum Protein Biomarker Findings Reflective of Oxidative Stress and Vascular Abnormalities in Male, but Not Female, Collision Sport Athletes
Source: Front Neurol. 2020 Sep 30;11:549624. doi: 10.3389/fneur.2020.549624 (PMC7561422; doi:10.3389/fneur.2020.549624)
Supplement: Supplementary file 3 [file Table_3.docx]

| **Supplementary Table 3. ﻿**Partial Spearman Correlation between serum protein levels of all biomarkers and participants athletic/concussion history in male and female sample. *P <.05. |
| --- |
| |  | Male | | | | | | | | | | | | | | --- | --- | --- | --- | --- | --- | --- | --- | --- | --- | --- | --- | --- | --- | | HNE4 | BLBP | CLDN5 | Fibrinogen | GFAP | HMGB1 | NFL | PEA15 | pTau | Tau | UCHL1 | VEGFa | vWF | | Years of exposure | .036 | .147 | -.059 | .093 | -.232 | .103 | -.197 | -.037 | .003 | .169 | -.276 | -.054 | .045 | | Age commence collision sport | .014 | -.019 | -.025 | -.067 | .08 | -.174 | -.041 | .014 | .014 | -.301 | -.012 | -.075 | -.182 | |  | Female | | | | | | | | | | | | | | HNE4 | BLBP | CLDN5 | Fibrinogen | GFAP | HMGB1 | NFL | PEA15 | pTau | Tau | UCHL1 | VEGFa | vWF | | Years of exposure | -.293 | .104 | -.037 | .087 | -.145 | -.090 | -.209 | -.145 | -.172 | .136 | .048 | -.156 | .136 | | Age commence collision sport | .158 | -.33 | .300 | .521* | .225 | .136 | .207 | -.317 | .327 | .325 | -.126 | -.414 | -.044 | |
